# Supplementary material for: A facile approach to hexanary chalcogenoborate featuring a 3-D chiral honeycomb-like open-framework constructed from rare-earth consolidating thiogallate-closo-dodecaborate
Source: Royal Society of Chemistry journal article supplement (doi:10.1039/b906124j), 2009-01-01
Supplement: b906124j.pdf [file b906124j.pdf]

## **Supporting Information**

### **A Facile Approach to Hexanary Chalcogenoborate Featuring 3-D Chiral Honeycomb-Like Open-Framework Constructed From Rare-Earth Consolidating Thiogallate-*Closo*-Dodecaborate**

*Sheng-Ping Guo, Guo-Cong Guo,\* Ming-Sheng Wang, Jian-Ping Zou, Hui-Yi Zeng, Li-Zhen Cai and Jin-Shun Huang*

State Key Lab of Structural Chemistry, Fujian Institute of Research on the Structure of Matter, Chinese Academy of Sciences, Fuzhou, Fujian 350002, P. R. China. Fax: (+86)591-83714946; Tel: (+86)591-83705882; E-mail: [gcguo@fjirsm.ac.cn](mailto:gcguo@fjirsm.ac.cn)

#### **Reagents and Syntheses**

All chemicals of analytical grade were purchased and used without further purification. A 500 mg mixture of Sm<sub>2</sub>O<sub>3</sub> (194 mg, 99.9%), Ga<sub>2</sub>O<sub>3</sub> (104 mg, 99.9%), S (142 mg, 99.999%) and B (60 mg, 99.9%) in the molar ratio of Sm : Ga : S : B = 1 : 1 : 8 : 10, and 400 mg KI (99%) as flux. The starting materials was ground into fine powders in an agate mortar and pressed into one pellet, followed by being loaded into one quartz tube. The tube was evacuated to  $1 \times 10^{-4}$  torr and flame-sealed. The sample was placed into a muffle furnace, heated from the room temperature to 300 °C in 5 h, kept at 300 °C for 10 h, then heated to 650 °C in 5 h, kept at 650 °C for 10 h, then heated to 950 °C in 5 h, kept at 950 °C for 10 days, then cooled down to 300 °C in 5 days, and powered off, some small yellow block crystals of **1** were obtained. Later, we repeated this experiment for many times, and yellow crystals with the same cell parameters with **1** can be obtained every time.

#### **EDS Analyses**

Semiquantitative microscopic element analyses on single crystals were performed on a field-emission scanning electron microscope (JSM6700F) equipped with an energy dispersive X-ray spectroscope (EDS, Oxford INCA). It confirmed the presence of Sm, K, I, B, S, Ga,

and no other elements were detected. The exact composition was established from the X-ray structure determination.

### Structure Determination

Single crystal of **1** was mounted on a glass fiber for the X-ray diffraction analyses. The data set was collected on a Rigaku Scxmini CCD diffractometer equipped with a graphite-monochromated Mo- $K\alpha$  radiation ( $\lambda = 0.71073 \text{ \AA}$ ) at 293 K. Intensities were corrected for  $Lp$  factors, and for empirical absorption using  $\omega$  scan technique. The structure was solved by direct methods and refined on  $F^2$  with full-matrix least-squares techniques using the SHELXTL<sup>TM</sup> version 5 package of crystallographic software.<sup>1</sup> The final refinement included anisotropic displacement parameters for all atoms and a secondary extinction correction.

### Second Harmonic Generation Measurement

Powder SHG measurement on hand-selected unsieved crystalline sample of **1** was performed on a modified Kurtz-NLO system using 1.06 and 1.94  $\mu\text{m}$  laser radiation, respectively. The SHG signal was collected in a reflection geometry from the excitation surface and focused into a fiber optic bundle. The output of the fiber optic bundle was coupled to the entrance slit of a spectrometer and detected using a CCD detector. KDP powder was used as a reference to assume the second-order NLO effect. No obvious SHG signals were detected when irradiated by 1.06  $\mu\text{m}$  laser due to their absorption in the visible-light region. A SHG efficiency of about 0.3 times that of KDP ( $\text{KH}_2\text{PO}_4$ ) was detected when irradiated by 1.94  $\mu\text{m}$  laser.

### Infrared and UV–Vis–NIR Diffuse Reflectance Spectroscopies

The IR spectrum was recorded by using a Nicolet Magana 750 FT-IR spectrophotometer in the range of 4000–400  $\text{cm}^{-1}$ . Powdery sample was pressed into one pellet with KBr. Diffuse reflectance measurement was taken at the room temperature on a computer-controlled Lambda 900 UV-Vis-NIR spectrometer equipped with an integrating sphere in the wavelength range 300–1700 nm. A  $\text{BaSO}_4$  plate was used as a reference. The spectrum was calculated

from reflection spectrum by the Kubelka-Munk function.<sup>2</sup>

**Table S1.** Selected bond distances (Å) for **1**.

| Bond          | Dist.    | Bond         | Dist.    | Bond         | Dist.    |
|---------------|----------|--------------|----------|--------------|----------|
| Sm(1)-S(2)#1  | 2.832(1) | Ga(1)-S(2)   | 2.342(1) | B(1)-B(1)#16 | 1.777(5) |
| Sm(1)-S(2)#2  | 2.832(1) | K(1)-S(2)    | 3.308(2) | B(1)-B(1)#12 | 1.813(8) |
| Sm(1)-S(2)    | 2.832(1) | K(1)-S(2)#11 | 3.308(2) | B(1)-B(2)#2  | 1.830(5) |
| Sm(1)-S(2)#3  | 2.832(1) | K(1)-S(1)#12 | 3.604(1) | B(2)-B(1)#12 | 1.770(4) |
| Sm(1)-S(2)#4  | 2.832(1) | K(1)-S(1)#13 | 3.604(1) | B(2)-B(2)#2  | 1.811(4) |
| Sm(1)-S(2)#5  | 2.832(1) | K(1)-I(1)#14 | 3.625(1) | B(2)-B(2)#4  | 1.811(4) |
| Ga(1)-S(1)    | 2.242(1) | K(1)-I(1)    | 3.625(1) | B(2)-B(1)#4  | 1.830(5) |
| Ga(1)-S(1)#11 | 2.242(1) | B(1)-B(2)    | 1.765(6) | S(2)-B(2)    | 1.867(3) |
| Ga(1)-S(2)#11 | 2.342(1) | B(1)-B(2)#12 | 1.770(4) | S(1)-B(1)    | 1.853(4) |

Symmetry codes: #1  $x, x-y+1, -z+1/2$ ; #2  $-x+y, -x+1, z$ ; #3  $-y+1, -x+1, -z+1/2$ ; #4  $-y+1, x-y+1, z$ ; #5  $-x+y, y, -z+1/2$ ; #6  $-y, x-y, z$ ; #7  $y, -x+y, z+1/2$ ; #8  $x-y, x, z+1/2$ ; #9  $-x, -y, z+1/2$ ; #10  $-x+y, -x, z$ ; #11  $-x, -x+y, -z+1$ ; #12  $x, x-y+1, -z+3/2$ ; #13  $-x, -y+1, z-1/2$ ; #14  $-x, -y, z-1/2$ ; #15  $-x, -y+1, z+1/2$ ; #16  $-y+1, -x+1, -z+3/2$ .

**Table S2.** List of known chalcogenoborato- *closo*-dodecaborates.<sup>3</sup>

| Compounds                                                                           | Structure <sup>a</sup> | Space Group                        | $d(\text{B-S/Se}) / \text{\AA}$ | $d(\text{B-B}) / \text{\AA}$ |
|-------------------------------------------------------------------------------------|------------------------|------------------------------------|---------------------------------|------------------------------|
| Cs <sub>8</sub> [B <sub>12</sub> (BSe <sub>3</sub> ) <sub>6</sub> ]                 | 0-D                    | <i>P</i> -1                        | 1.981(8) – 2.011 (8)            | 1.753 (12) – 1.803 (12)      |
| Rb <sub>8</sub> [B <sub>12</sub> (BSe <sub>3</sub> ) <sub>6</sub> ]                 | 0-D                    | <i>P</i> -1                        | 1.977 (14) – 2.027 (15)         | 1.696 (19) – 1.817 (16)      |
| Na <sub>8</sub> [B <sub>12</sub> (BSe <sub>3</sub> ) <sub>6</sub> ]                 | 0-D                    | <i>P</i> 2 <sub>1</sub> / <i>c</i> | 1.967 (4) – 2.021 (4)           | 1.764 (5) – 1.805 (5)        |
| K <sub>8</sub> [B <sub>12</sub> (BSe <sub>3</sub> ) <sub>6</sub> ]                  | 0-D                    | <i>Cm</i>                          | 1.963 (15) – 2.042 (19)         | 1.720 (18) – 1.830 (20)      |
| Rb <sub>4</sub> Hg <sub>2</sub> [B <sub>12</sub> (BSe <sub>3</sub> ) <sub>6</sub> ] | 0-D                    | <i>P</i> -1                        | 1.975 (16) – 1.999 (13)         | 1.770 (20) – 1.810 (20)      |
| Cs <sub>4</sub> Hg <sub>2</sub> [B <sub>12</sub> (BSe <sub>3</sub> ) <sub>6</sub> ] | 0-D                    | <i>P</i> -1                        | 1.989 (8) – 2.003 (9)           | 1.758 (13) – 1.803 (12)      |
| Rb <sub>8</sub> [B <sub>12</sub> (BS <sub>3</sub> ) <sub>6</sub> ]                  | 0-D                    | <i>P</i> -1                        | 1.842(5) – 1.862 (5)            | 1.752 (6) – 1.809 (6)        |
| Cs <sub>8</sub> [B <sub>12</sub> (BS <sub>3</sub> ) <sub>6</sub> ]                  | 0-D                    | <i>P</i> -1                        | 1.851 (6) – 1.866 (6)           | 1.767 (8) – 1.811 (8)        |
| Na <sub>2</sub> [B <sub>18</sub> Se <sub>16</sub> ]                                 | 3-D                    | <i>P</i> -3                        | 1.991 (7) – 1.997 (5)           | 1.752 (9) – 1.811(8)         |
| Na <sub>6</sub> [B <sub>18</sub> Se <sub>17</sub> ]                                 | 1-D                    | <i>C</i> 2/ <i>c</i>               | 1.985 (7) – 2.005 (8)           | 1.742 (11) – 1.794 (11)      |

<sup>a</sup> 0-D, 1-D and 3-D represent discrete, chain and three dimensional structures, respectively.

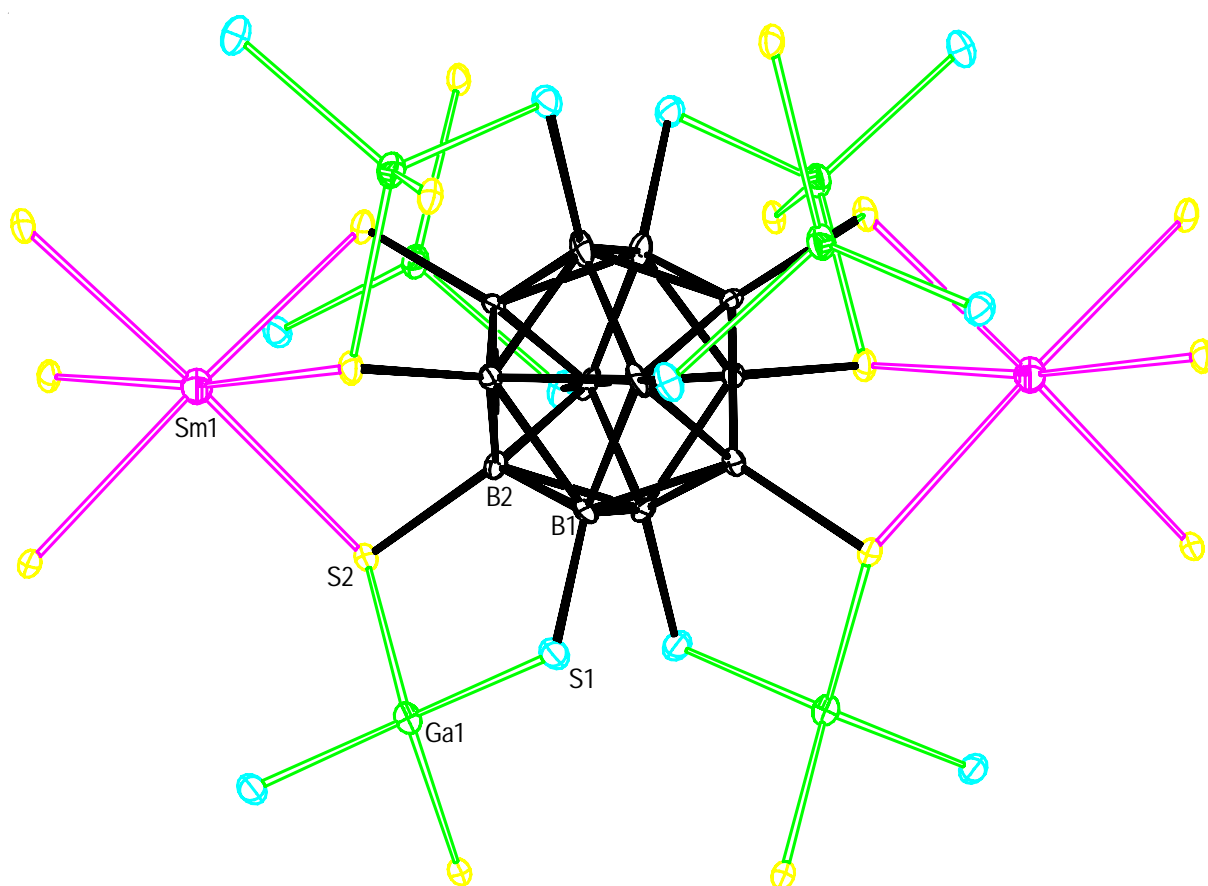

(a)

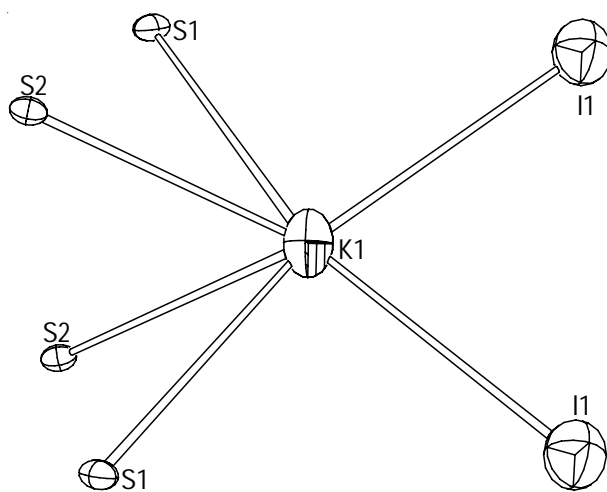

(b)

**Figure S1.** Coordination geometries of B, Sm, Ga and K in **1** with 30% thermal ellipsoids.

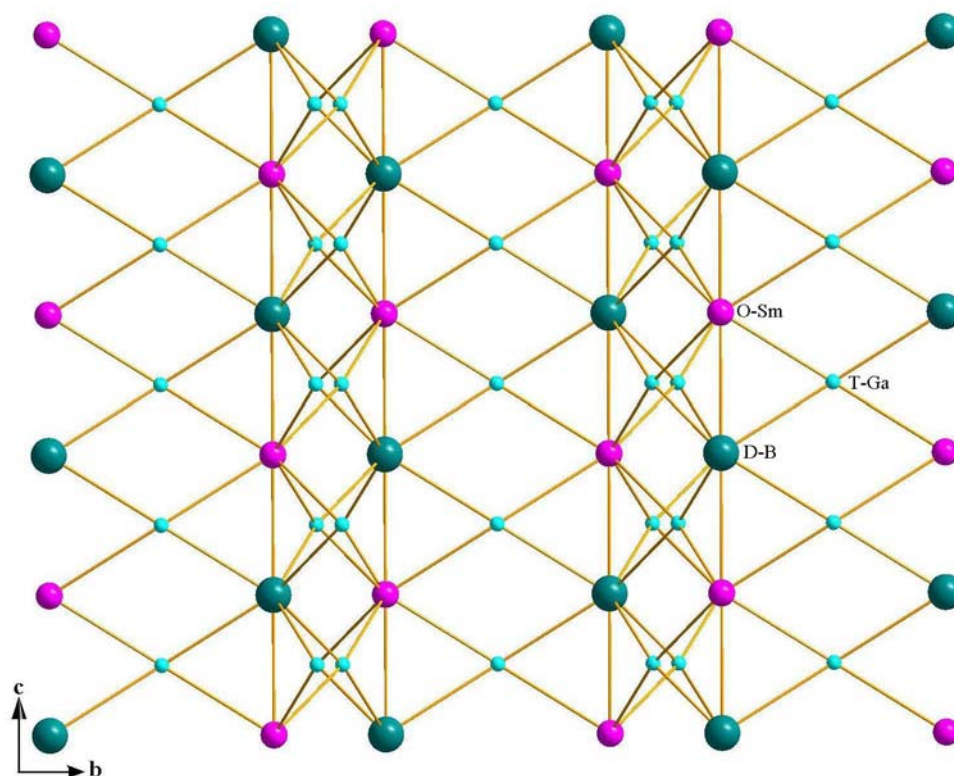

**Figure S2.** Simplified honeycomb-like open-framework of **1** along the *a* direction, where the dark yellow, turquoise and pink balls represent B<sub>12</sub> dodecaborate (D-B), GaS<sub>4</sub> tetrahedra (T-Ga) and SmS<sub>6</sub> octahedra (O-Sm), respectively.

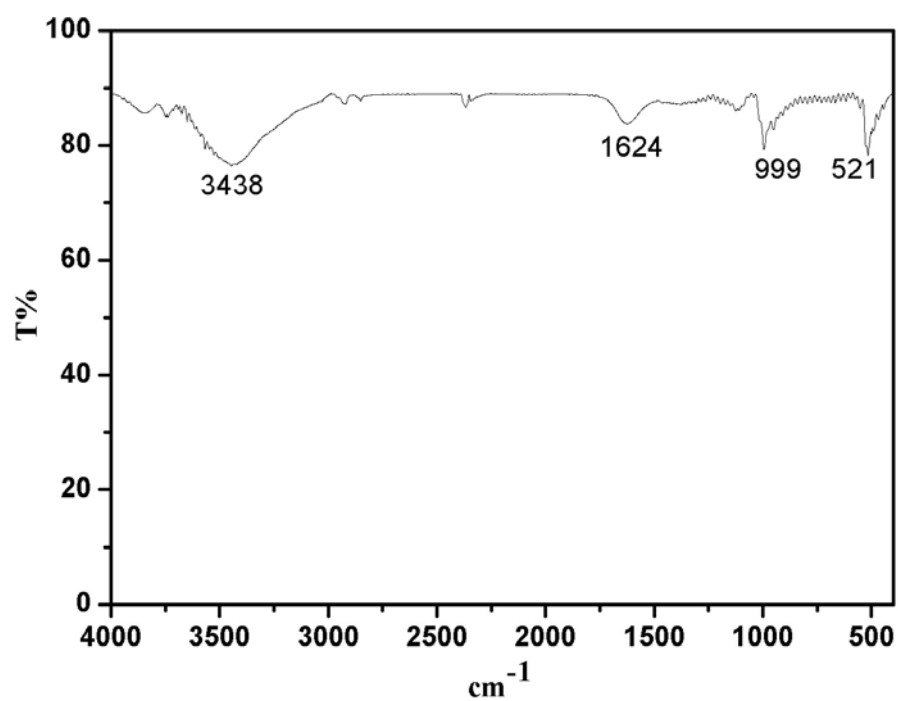

**Figure S3.** FT-IR spectrum of **1**.

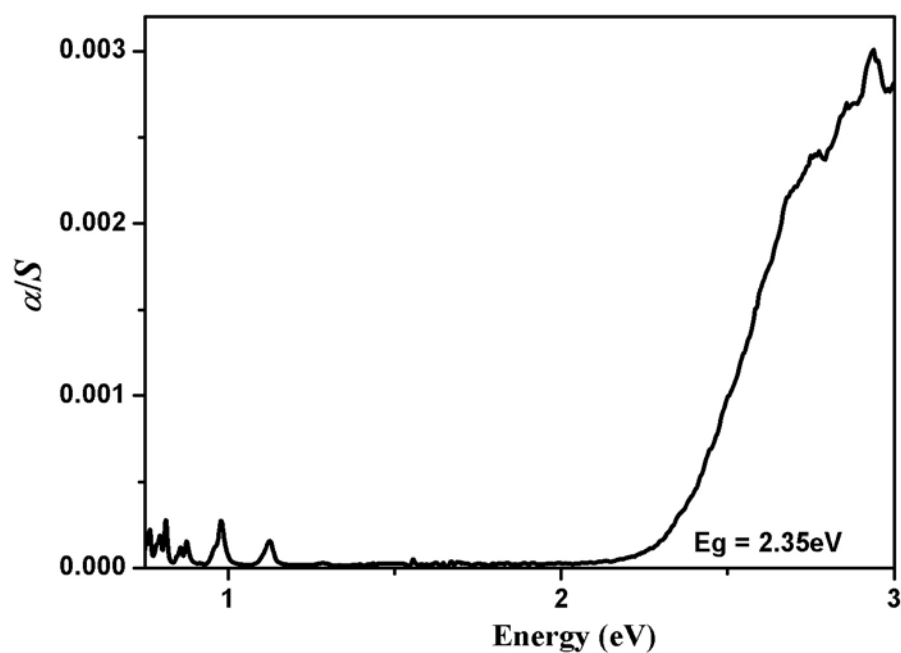

**Figure S4.** Diffuse reflectance spectrum of **1**.

References:

- 1 Siemens, *SHELXTL<sup>TM</sup> Version 5 Reference Manual*, Siemens Energy & Automation Inc., Madison, Wisconsin, USA, **1994**.
- 2 (a) W. W. Wendlandt, H. G. Hecht, *Reflectance Spectroscopy*, Interscience Publishers, New York, **1966**; (b) G. Kortüm, *Reflectance Spectroscopy*, Springer, **1969**.
- 3 See the reference 5 in the manuscript.
